# Supplementary material for: Characterisation of bifunctional ruthenium(II) complexes, potential DNA photo-probes. Presence of folded and unfolded conformers †
Source: Royal Society of Chemistry journal article supplement (doi:10.1039/b000197j), 2000-01-01
Supplement: b000197j.doc [file b000197j.doc]

| Complex |  |  | RuTAP2 | Phen2+ |  | RuBPY2 | Phen2+ |
| --- | --- | --- | --- | --- | --- | --- | --- |
| Ligand | Proton |  | DMSO-*d6* | CD3CN |  | DMSO-*d6* | CD3CN |
| TAP | T3 |  | 8.23 | 8.12 |  |  |  |
|  | T6 |  | 8.49 | 8.24 |  |  |  |
|  | T2 |  | 9.04 | 8.95 |  |  |  |
|  | T7 |  | 9.04 | 8.95 |  |  |  |
|  | T9,10 |  | 8.65 | 8.61 |  |  |  |
| Phen | P2,9 |  | 8.27 | 8.11 |  | 8.14 | 8.10 |
|  | P3,8 |  | 7.79 | 7.70 |  | 7.91 | 7.75 |
|  | P4,7 |  | 8.84 | 8.70 |  | 8.84 | 8.62 |
|  | P5,6 |  | 8.40 | 8.30 |  | 8.41 | 8.25 |
| BPY | B3,3' |  |  |  |  | 8.92 / 8.96 | 8.50 / 8.54 |
|  | B4,4' |  |  |  |  | 8.11 / 8.22 | 8.00 / 8.11 |
|  | B5,5' |  |  |  |  | 7.36 / 7.60 | 7.23 / 7.46 |
|  | B6,6' |  |  |  |  | 7.56 / 7.85 | 7.54 / 7.87 |

| Complex |  |  | RuTAP2 | acPhen2+ |  | RuBPY2 | acPhen2+ |
| --- | --- | --- | --- | --- | --- | --- | --- |
| Ligand | Proton |  | DMSO-*d6* | CD3CN |  | DMSO-*d6* | CD3CN |
| TAP | T3,3' |  | 8.24 / 8.23 | 8.13 |  |  |  |
|  | T6,6' |  | 8.49 / 8.47 | 8.22 |  |  |  |
|  | T2,2' |  | 9.05 | 8.94 |  |  |  |
|  | T7,7' |  | 9.05 | 8.94 |  |  |  |
|  | T9,10 |  | 8.66 | 8.60 |  |  |  |
| acPhen | P2,9 |  | 8.16 / 8.29 | 8.00 / 8.13 |  | 8.02 / 8.15 | 8.10 / 7.98 |
|  | P3,8 |  | 7.82 / 7.73 | 7.72 / 7.63 |  | 7.90 / 7.82 | 7.75 / 7.68 |
|  | P4,7 |  | 8.97 / 8.79 | 8.82 / 8.61 |  | 8.94 / 8.73 | 8.74 / 8.54 |
|  | P6 |  | 8.66 | 8.62 |  | 8.64 | 8.60 |
|  | NH |  | 10.48 | 9.00 |  | 10.43 | 8.89 |
| BPY | B3,3' |  |  |  |  | 8.82 / 8.86 | 8.48 / 8.52 |
|  | B4,4' |  |  |  |  | 8.10 / 8.21 | 7.99 / 8.09 |
|  | B5,5' |  |  |  |  | 7.36 / 7.57 | 7.23 / 7.44 |
|  | B6,6' |  |  |  |  | 7.56 / 7.82 | 7.54 / 7.83 |

| Complex |  | RuTAP2POQ | -Nmet2+ |  | RuBPY2POQ | -Nmet2+ |
| --- | --- | --- | --- | --- | --- | --- |
| Ligand | Proton | DMSO-*d6* | CD3CN |  | DMSO-*d6* | CD3CN |
| TAP | T3,3' | 8.32 / 8.26 | 8.15 |  |  |  |
|  | T6,6' | 8.53 / 8.51 | 8.23 |  |  |  |
|  | T2,2' | 9.07 / 9.06 | 8.95 |  |  |  |
|  | T7,7' | 9.05 / 9.04 | 8.98 |  |  |  |
|  | T9,10 | 8.65 | 8.60 |  |  |  |
| acPhen~ | P2,9 | 8.31 / 8.18 | 8.04 / 8.10 |  | 8.16 / 8.04 | 8.02 / 8.10 |
|  | P3,8 | 7.79 / 7.73 | 7.66 / 7.59 |  | 7.89 / 7.83 | 7.69 / 7.69 |
|  | P4,7 | 9.48 / 8.76 | 8.53 / 8.49 |  | 9.06 / 8.71 | 8.51 / 8.47 |
|  | P6 | 8.62 | 8.36 |  | 8.59 | 8.38 |
|  | NH | 11.65 | 9.03 |  | 10.9 | 9.05 |
| ~Nmet-Q | Q2 | 8.47 | 8.20 |  | 8.52 | 8.26 |
|  | Q3 | 7.15 | 6.82 |  | 7.07 | 6.89 |
|  | Q5 | 8.35 | 8.10 |  | 8.25 | 8.13 |
|  | Q6 | 7.54 | 7.36 |  | 7.49 | 7.35 |
|  | Q8 | 8.11 | 7.34 |  | 7.89 | 7.56 |
| BPY | B3,3' |  |  |  | 8.82 / 8.86 | 8.48 / 8.52 |
|  | B4,4' |  |  |  | 8.10 / 8.21 | 7.98 / 8.09 |
|  | B5,5' |  |  |  | 7.37 / 7.59 | 7.25 / 7.44 |
|  | B6,6' |  |  |  | 7.59 / 7.83 | 7.57 / 7.83 |

|  |  | POQ | -Nmet |  | Nmet- | quinoline **I** |
| --- | --- | --- | --- | --- | --- | --- |
|  | Proton | DMSO-*d6* | CD3CN |  | DMSO-*d6* | CD3CN |
| acPhen~ | P2,9 | 9.13 / 9.04 | 9.10 / 9.05 |  |  |  |
|  | P3,8 | 7.79 / 7.74 | 7.67 / 7.66 |  |  |  |
|  | P4,7 | 8.58 / 8.43 | 8.37 / 8.27 |  |  |  |
|  | P6 | 8.13 | 8.00 |  |  |  |
| ~Nmet-Q | Q2 | 8.59 | 8.53 |  | 8.59 | 8.61 |
|  | Q3 | 6.98 | 6.90 |  | 6.93 | 6.92 |
|  | Q5 | 8.12 | 8.08 |  | 8.29 | 8.30 |
|  | Q6 | 7.43 | 7.31 |  | 7.47 | 7.44 |
|  | Q8 | 7.89 | 7.79 |  | 7.91 | 7.96 |
|  | NH | 10.25 | 8.90 |  |  |  |
